# Supplementary material for: A Conserved Stem-Loop Structure within ORF5 Is a Frequent Recombination Hotspot for Porcine Reproductive and Respiratory Syndrome Virus 1 (PRRSV-1) with a Particular Modified Live Virus (MLV) Strain
Source: Viruses. 2023 Jan 16;15(1):258. doi: 10.3390/v15010258 (PMC9867337; doi:10.3390/v15010258)
Supplement: Supplementary file 1 [file viruses-15-00258-s001.zip › S2_Figure3_Accession_Numbers.xlsx]

## Sheet: Tabelle1
KX815421.1
KX815422.1
KX815433.1
KX815434.1
JX235366.1
KX815427.1
KX815426.1
JX235367.1
JQ326271.1
KX815424.1
MF187956.1
KX815420.1
FJ797690.1
KX815418.1
KX815414.1
EU624117.1
JX192633.1
JX215551.1
JX215554.1
JX235370.1
JX235365.1
EU200962.1
KX815430.1
KX815431.1
KX815429.1
KF815525.1
KX766378.1
KX815410.1
KX650082.1
KX815408.1
KX815409.1
KX815416.1
KX815417.1
KX815407.1
JX192638.1
JX215553.1
JX192635.1
JX192637.1
KM453698.1
KM453699.1
JX215552.1
JX192639.1
KX815412.1
JX192636.1
JX192634.1
HQ233605.1
JX192632.1
MK315209.1
MK315210.1
MK315208.1
KJ523895.1
KJ523897.1
KJ523896.1
KJ523894.1
KX815411.1
KJ747052.1
AY032626.1
JX679179.1
MF124329.1
AF494042.1
OM681585.1
KU131565.1
KU131563.1
MH324400.1
KP704287.1
MF196905.1
KU131562.1
KU131567.1
KU131569.1
JX857698.1
KC862581.1
MT746146.1
KC862576.1
KC862578.1
KC862577.1
KU131564.1
KC862580.1
KU131559.1
KC862575.1
AF046869.1
KF183946.1
KF183947.1
KC862583.1
KC862584.1
KC862585.1
KC862582.1
JX258843.1
KU131561.1
KC862579.1
KU131558.1
KX815415.1
KX815432.1
KX815419.1
KX815423.1
KX815428.1
KX815413.1
MH588710.1
KX815425.1
KX169191.1
MF196906.1
OM681586.1
OL516347.1
KU131557.1
KU131566.1
KU131568.1
A26843.1
M96262.2
NC043487.1
AY588319.1
KR296711.1
MT311646.1
OK635576.1
MW448197.1
KC862567.1
KC862574.1
KC862568.1
KC862569.1
KC862573.1
KC862570.1
GU067771.1
MN604234.1
MZ287329.1
MZ417465.1
KY767026.1
MH018883.1
KF001144.1
KJ415276.1
KU131560.1
MZ417464.1
MK876228.1
MN603982.1
KU560579.1
KY366411.1
GU047344.1
JX187609.1
MK359275.1
MK359276.1
MK359283.1
MK359284.1
MK359268.1
MK359273.1
MK359267.1
MK359266.1
MK359258.1
KC862566.1
KC862571.1
KC862572.1
MK359269.1
MK359274.1
MK359270.1
MK359271.1
MK359278.1
MK359281.1
MK359280.1
MK359264.1
MK359265.1
MK359272.1
MK359279.1
MK359277.1
MK359282.1
MK359261.1
MK359260.1
MK359262.1
MK359259.1
GU047345.1
MZ417463.1
KT033457.1
MZ287330.1
MZ287328.1
MZ287327.1
MW847781.1
KT344816.1
KT988004.1
MK359263
KT326148.1
KX967492.1
KC492504.1
KC492505.1
KC492506.1
MK024324.1
KX622783.1
KT159249.1
GU737264.2
KT334375.1
MH463457.1
MT000052.1
MH463459.1
MW115431.1
MH463458.1
MK024327.1
MK024325.1
MZ417496.1
MZ417495.1
KT159248.1
MZ417409.1
MK639926.1
MZ417420.1
MH463455.1
MH463456.1
MK024326.1
MF346695.1
KP889243.1
JF802085.1
KX668221.1
MT008024.1
